# Supplementary material
Source: publisher figshare collection journal article supplement (https://diabetesjournals.figshare.com/articles/dataset/_/12280772)

**A**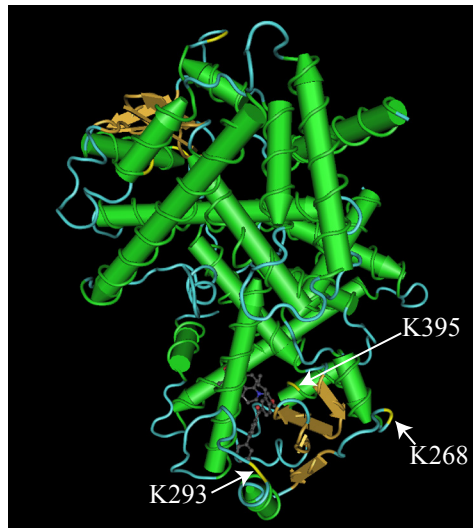**B**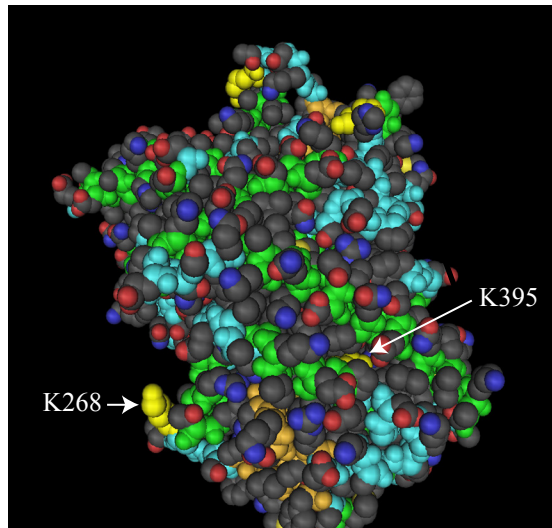

Supplement: Supplementary file 1 [file 1]

**A**

WTD, 8 wks

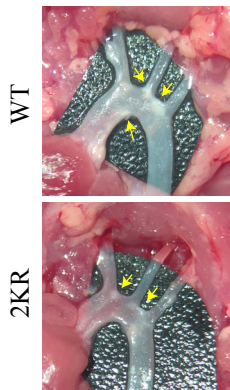**B**

WT 2KR

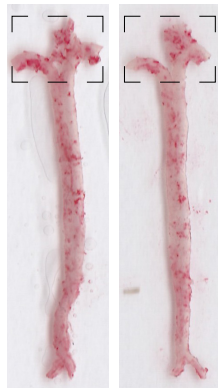**C**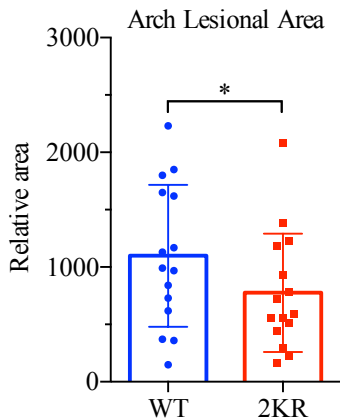**D**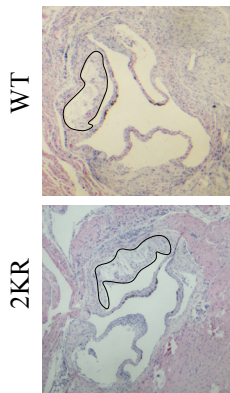**E**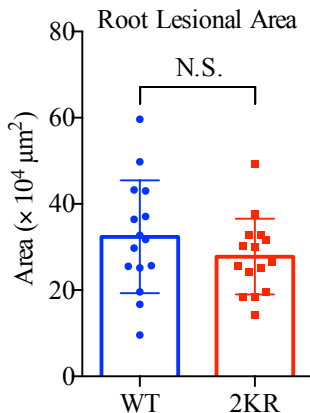**F**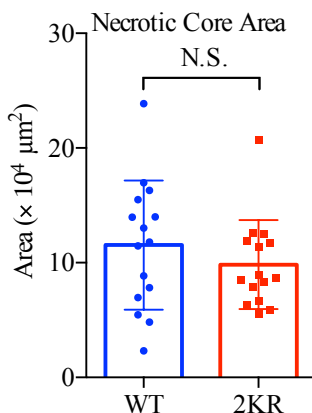

Supplement: Supplementary file 2 [file 1]

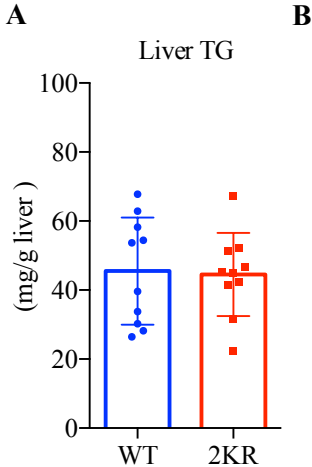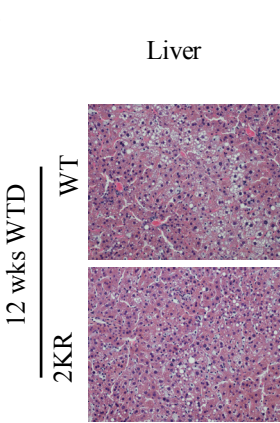

Supplement: Supplementary file 3 [file 1]

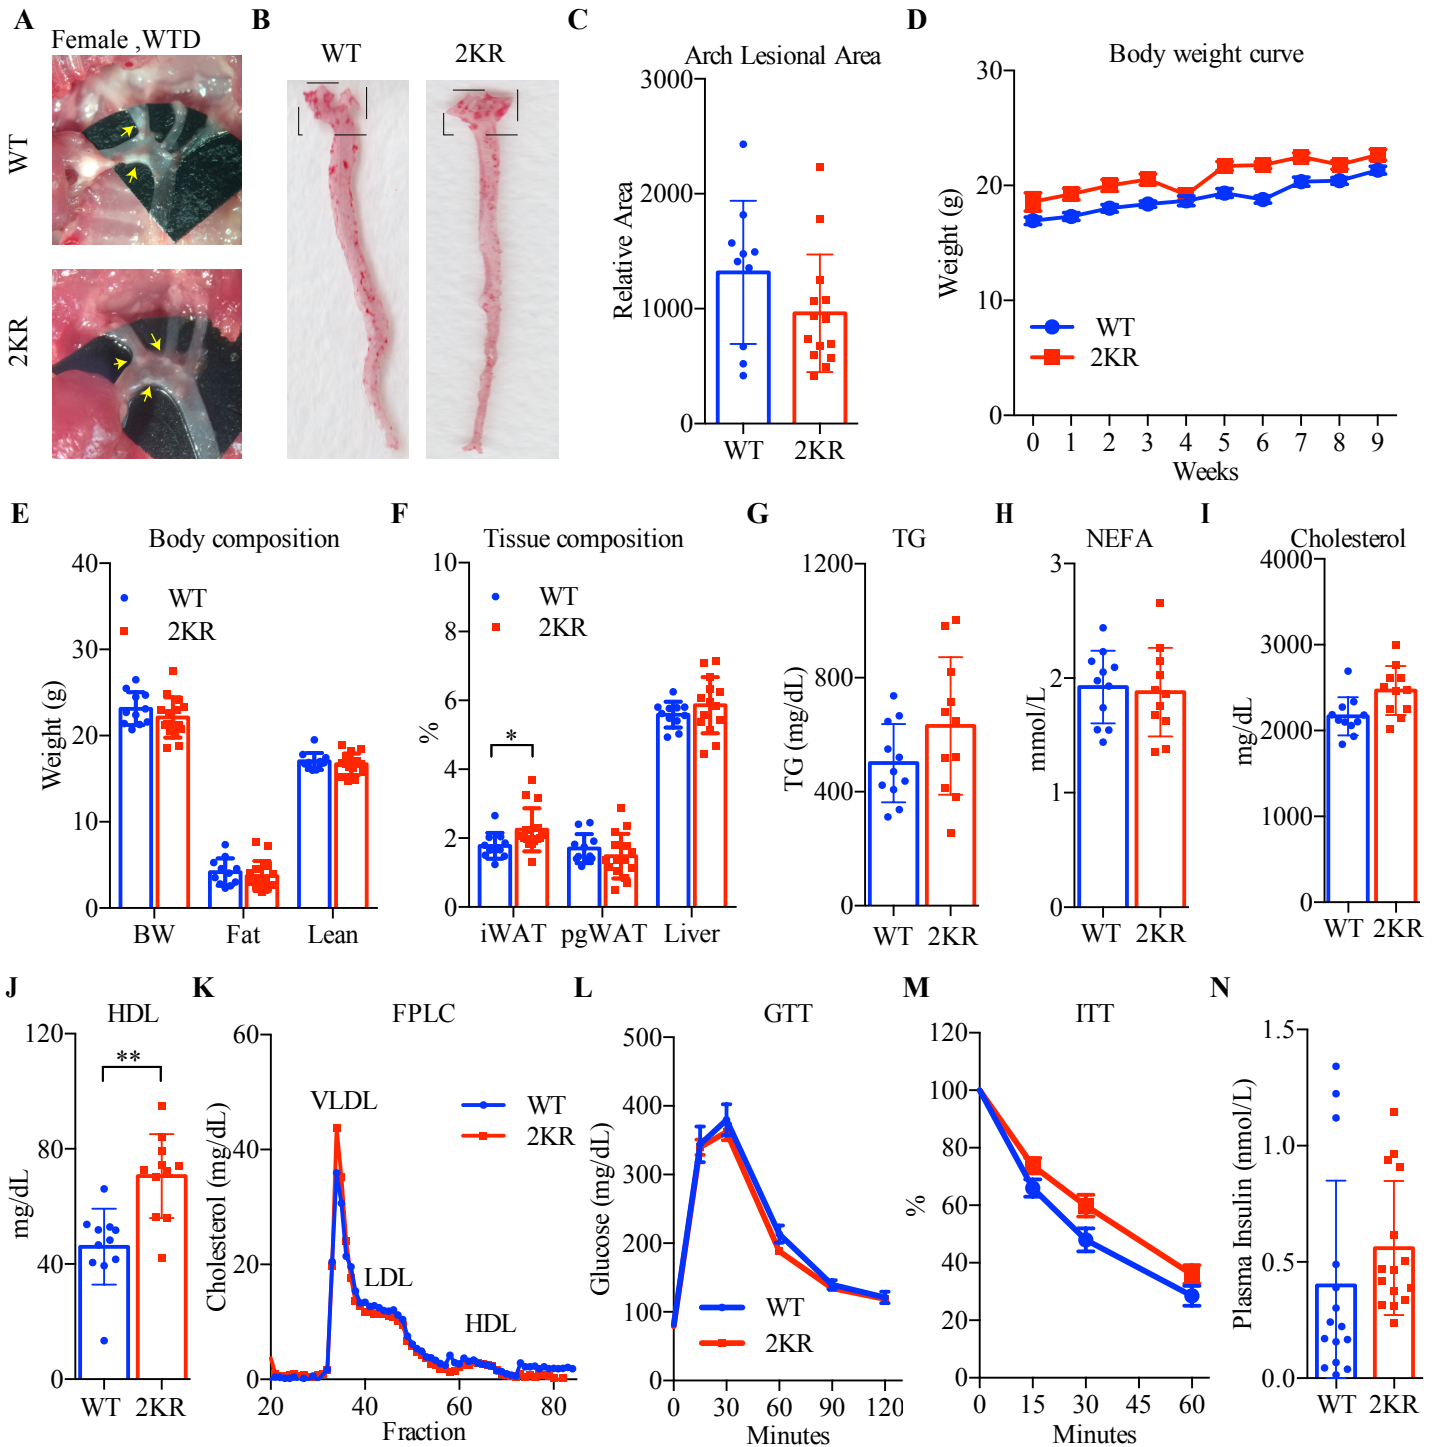

Supplement: Supplementary file 4 [file 1]
